# Supplementary material for: Low molecular weight ε-caprolactone-p-coumaric acid copolymers as potential biomaterials for skin regeneration applications
Source: PubMed Central journal article supplement (PMC6453441; doi:10.1371/journal.pone.0214956), 2019-04-08
Supplement: pone.0214956.s001.pdf [file pone.0214956.s001.pdf]

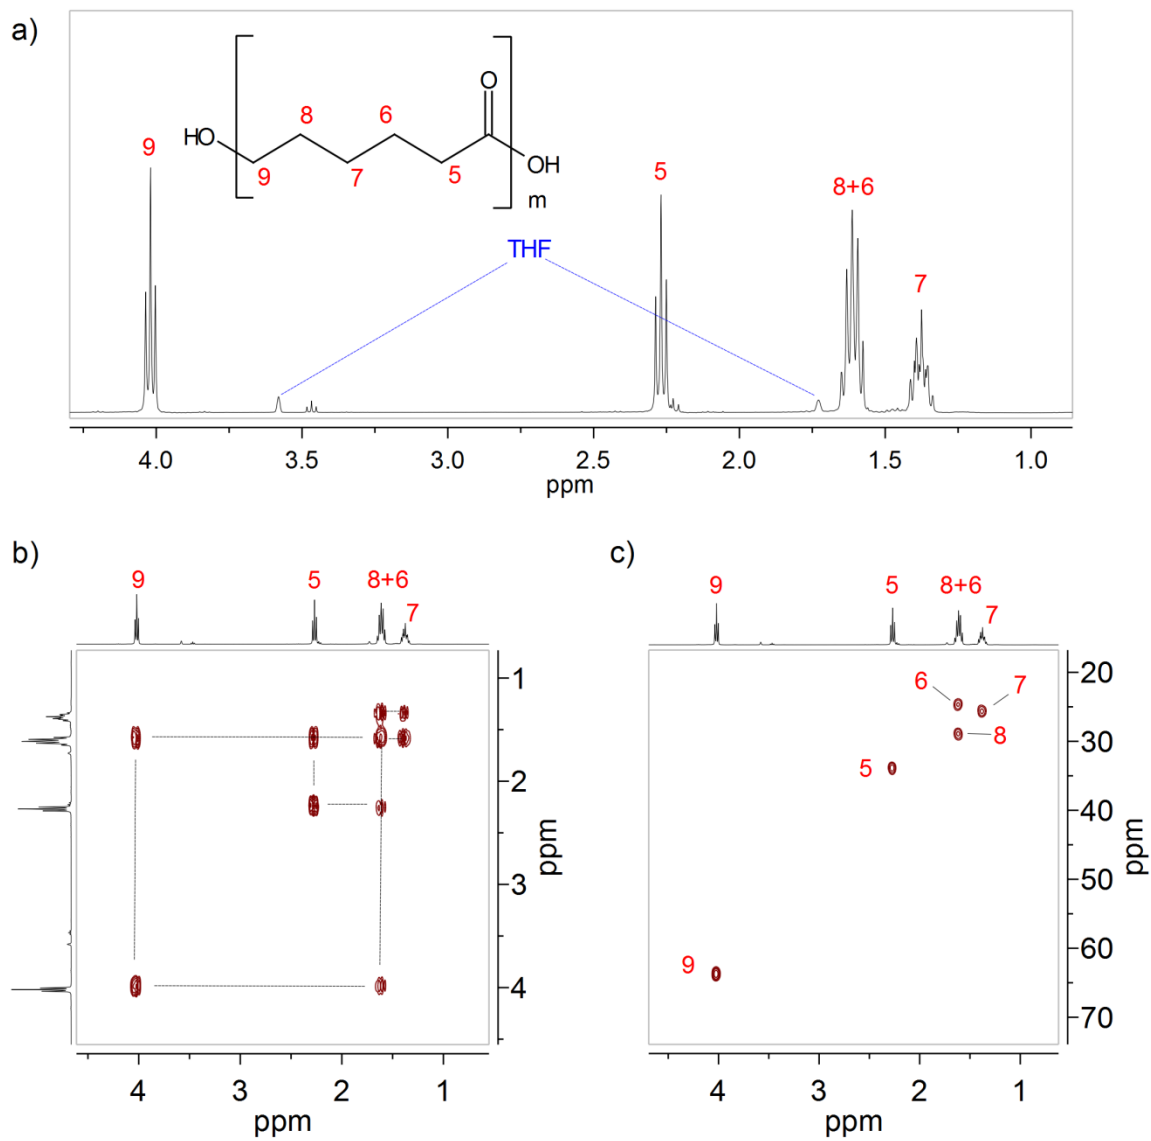

**S1 Fig. 1D and 2D spectra of PCL.** PCL in THF-d<sub>8</sub> NMR spectra: a) <sup>1</sup>H b) <sup>1</sup>H-<sup>1</sup>H COSY c) <sup>1</sup>H-<sup>13</sup>C HSQC.
