# Supplementary material for: Low molecular weight ε-caprolactone-p-coumaric acid copolymers as potential biomaterials for skin regeneration applications
Source: PubMed Central journal article supplement (PMC6453441; doi:10.1371/journal.pone.0214956), 2019-04-08
Supplement: pone.0214956.s002.pdf [file pone.0214956.s002.pdf]

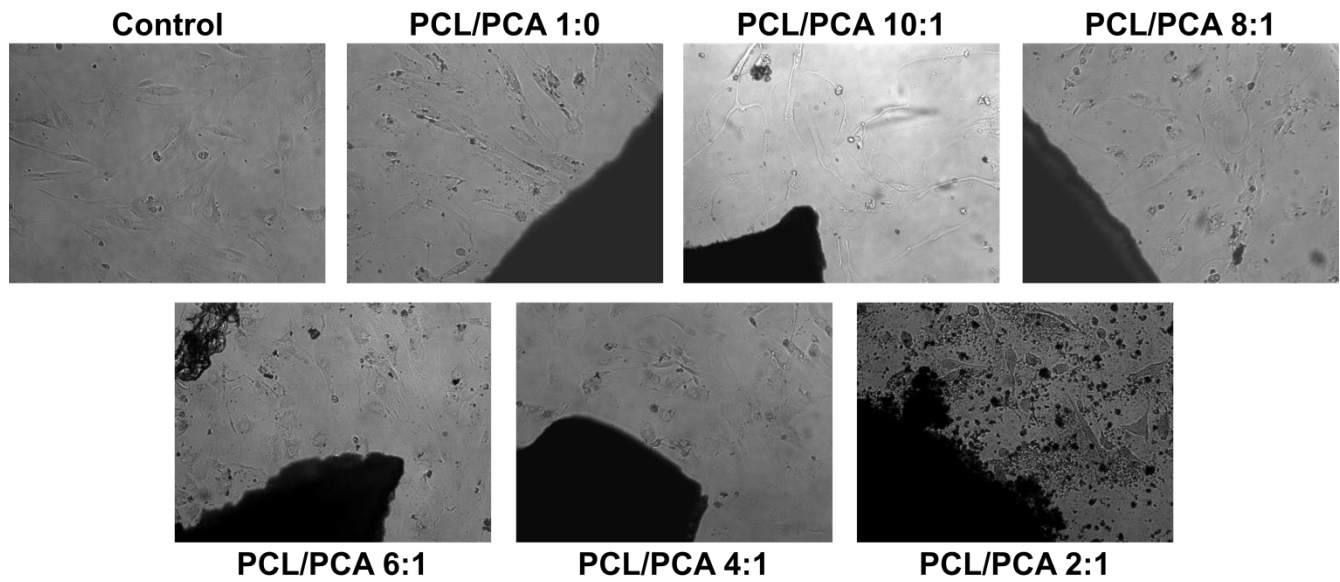

**S2 Fig. Cellular morphological analysis.** Representative morphological images of HDFa cells incubated or not (control) with t PCL-PCA 1:0, 10:1, 8:1, 6:1, 4:1, 2:1 films for 72h.
